# Supplementary material
Source: MDPI journal article supplement (https://www.mdpi.com/2073-4441/13/1/57)
Supplement: s1 [file s1]

SUPPLEMENTARY MATERIAL

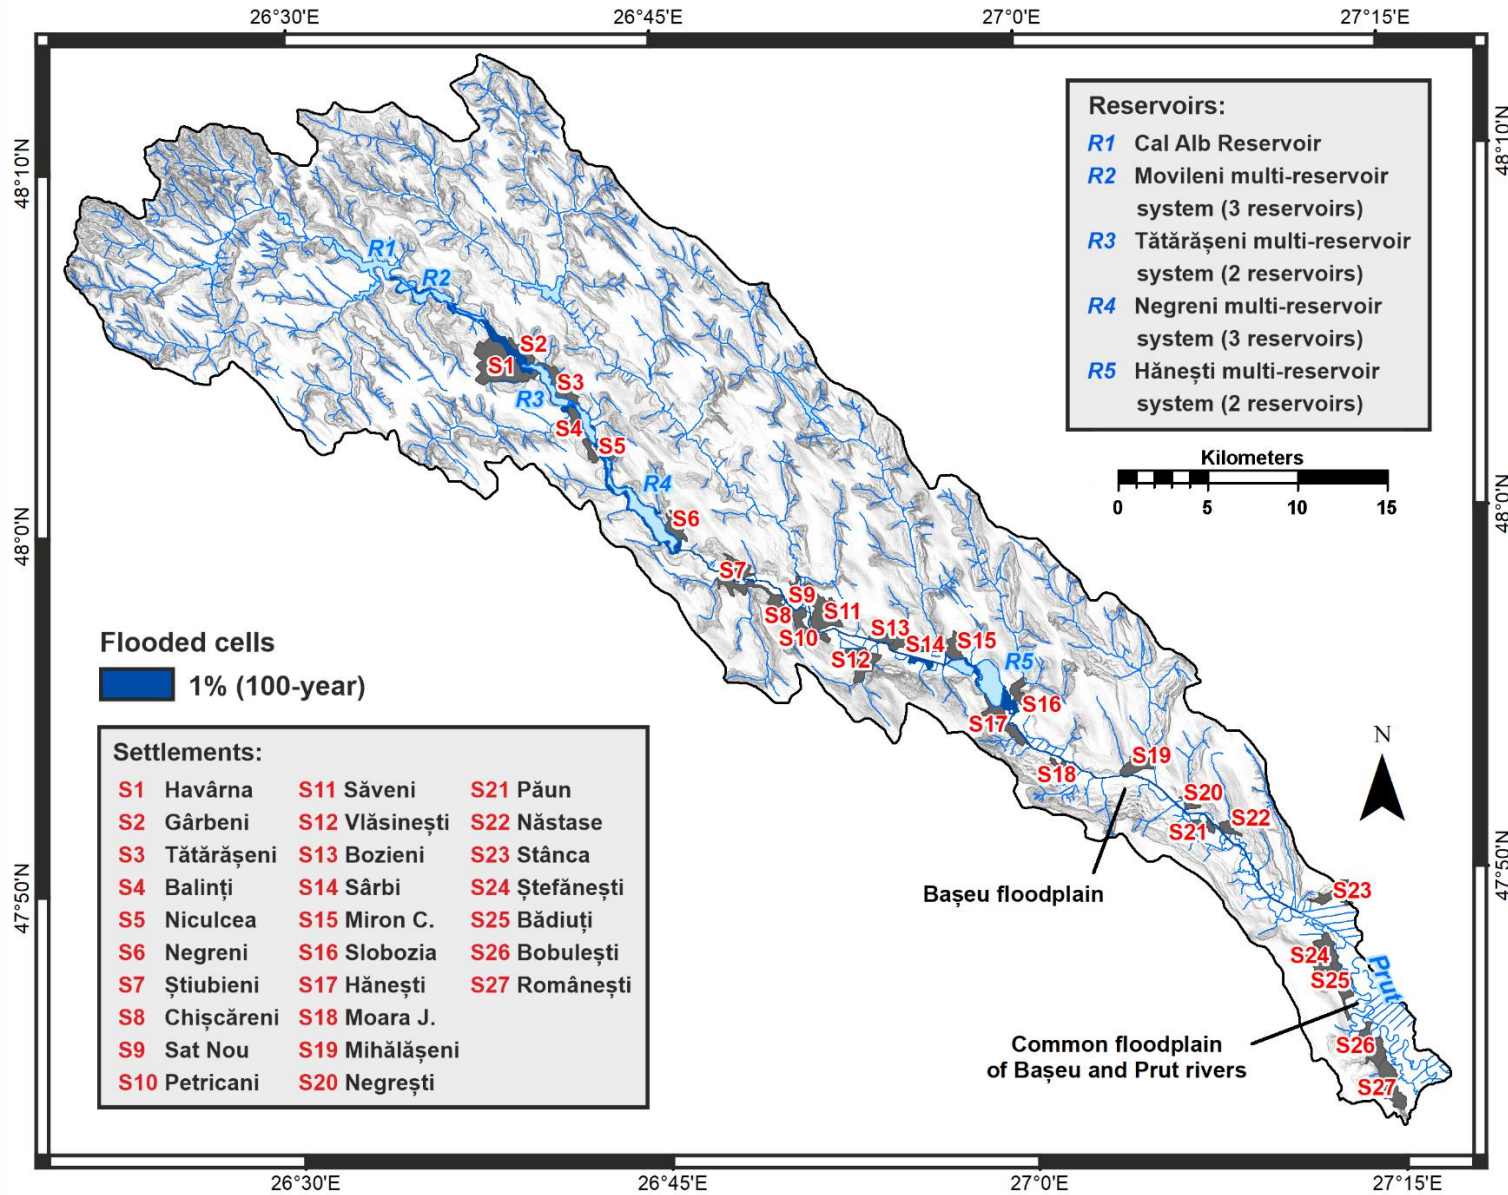

**Figure S1** Flood extent within built-up area of 27 settlements located downstream of the Cal Alb reservoir computed for dam break scenarios with 1% (100-year) recurrence intervals

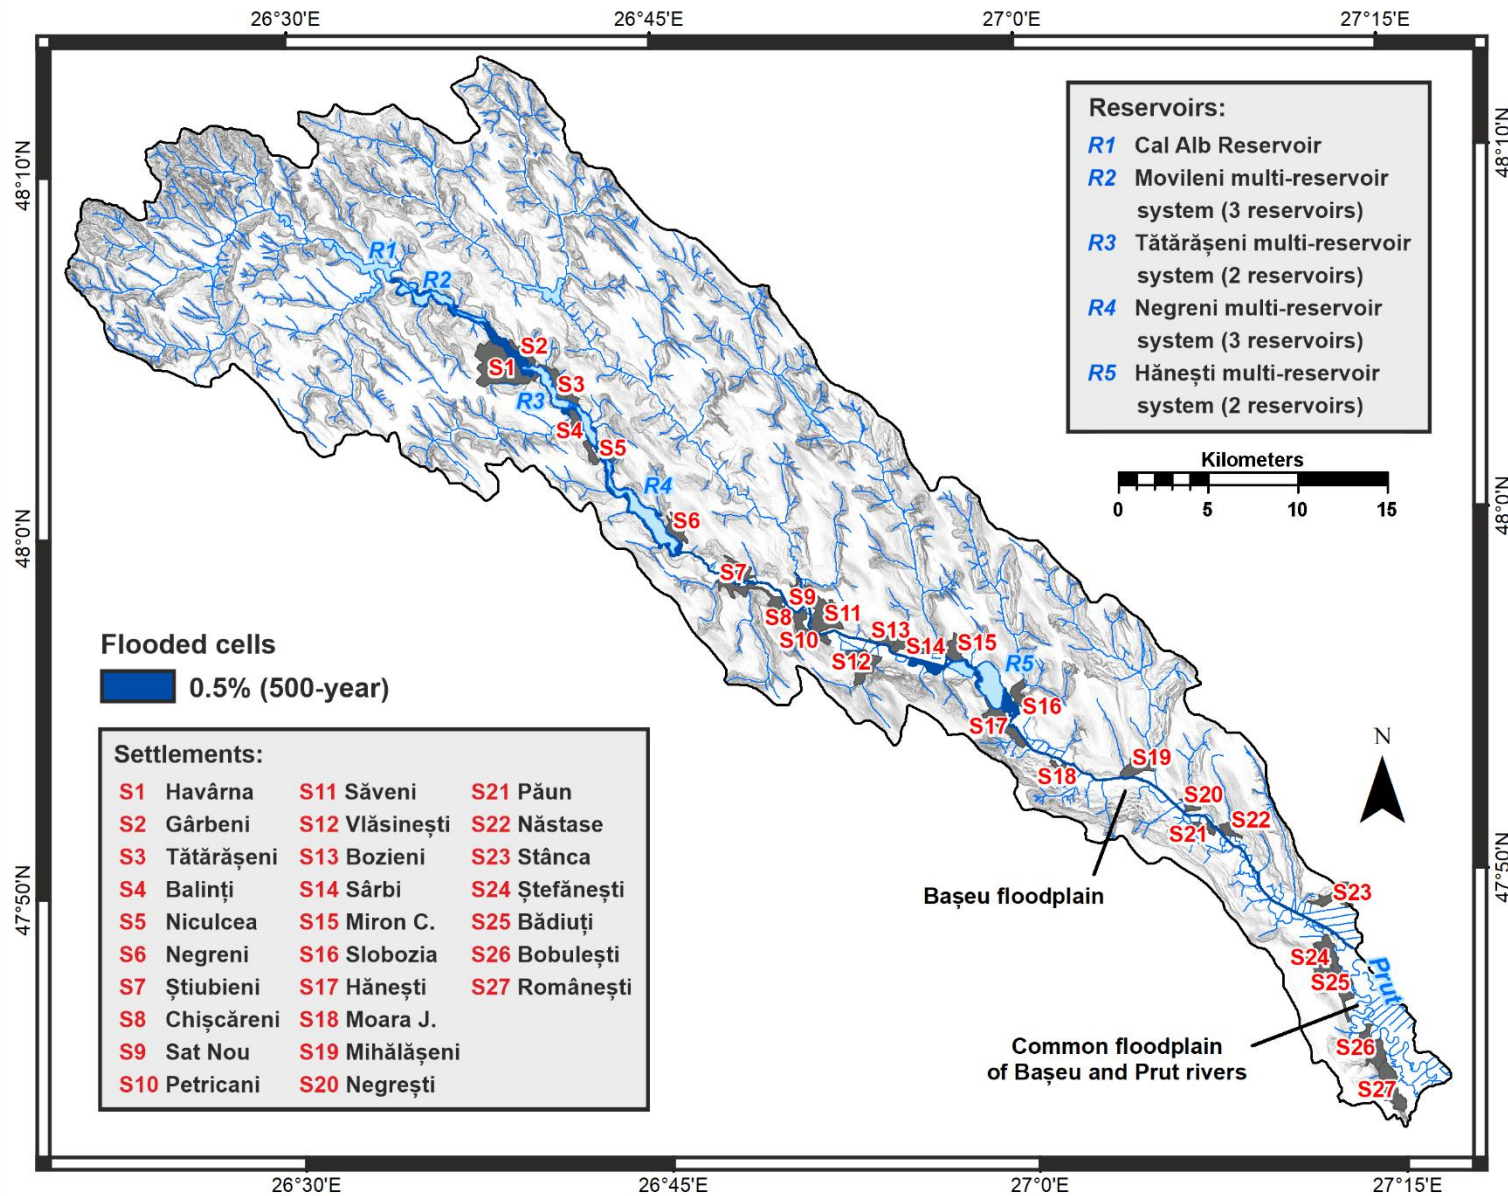

**Figure S2** Flood extent within built-up area of 27 settlements located downstream of the Cal Alb reservoir computed for dam break scenarios with 0.5% (500-year) recurrence intervals



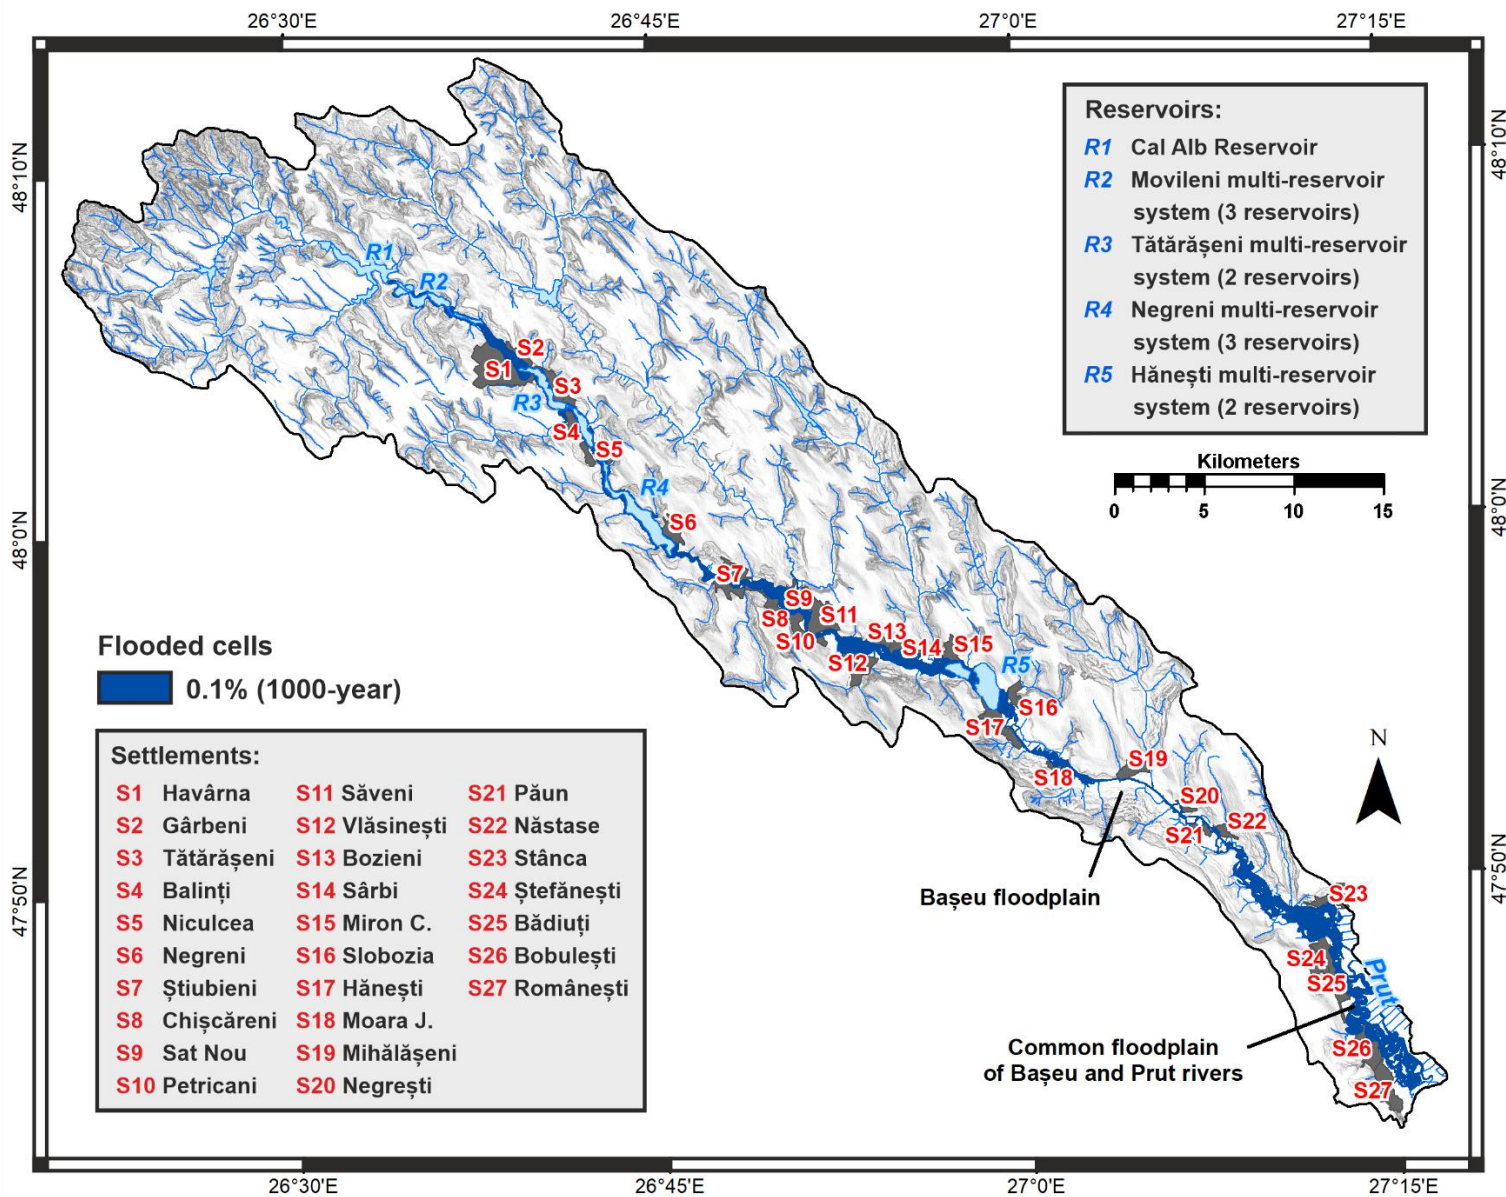

**Figure S3** Flood extent within built-up area of 27 settlements located downstream of the Cal Alb reservoir computed for dam break scenarios with 0.1% (1000-year) recurrence intervals

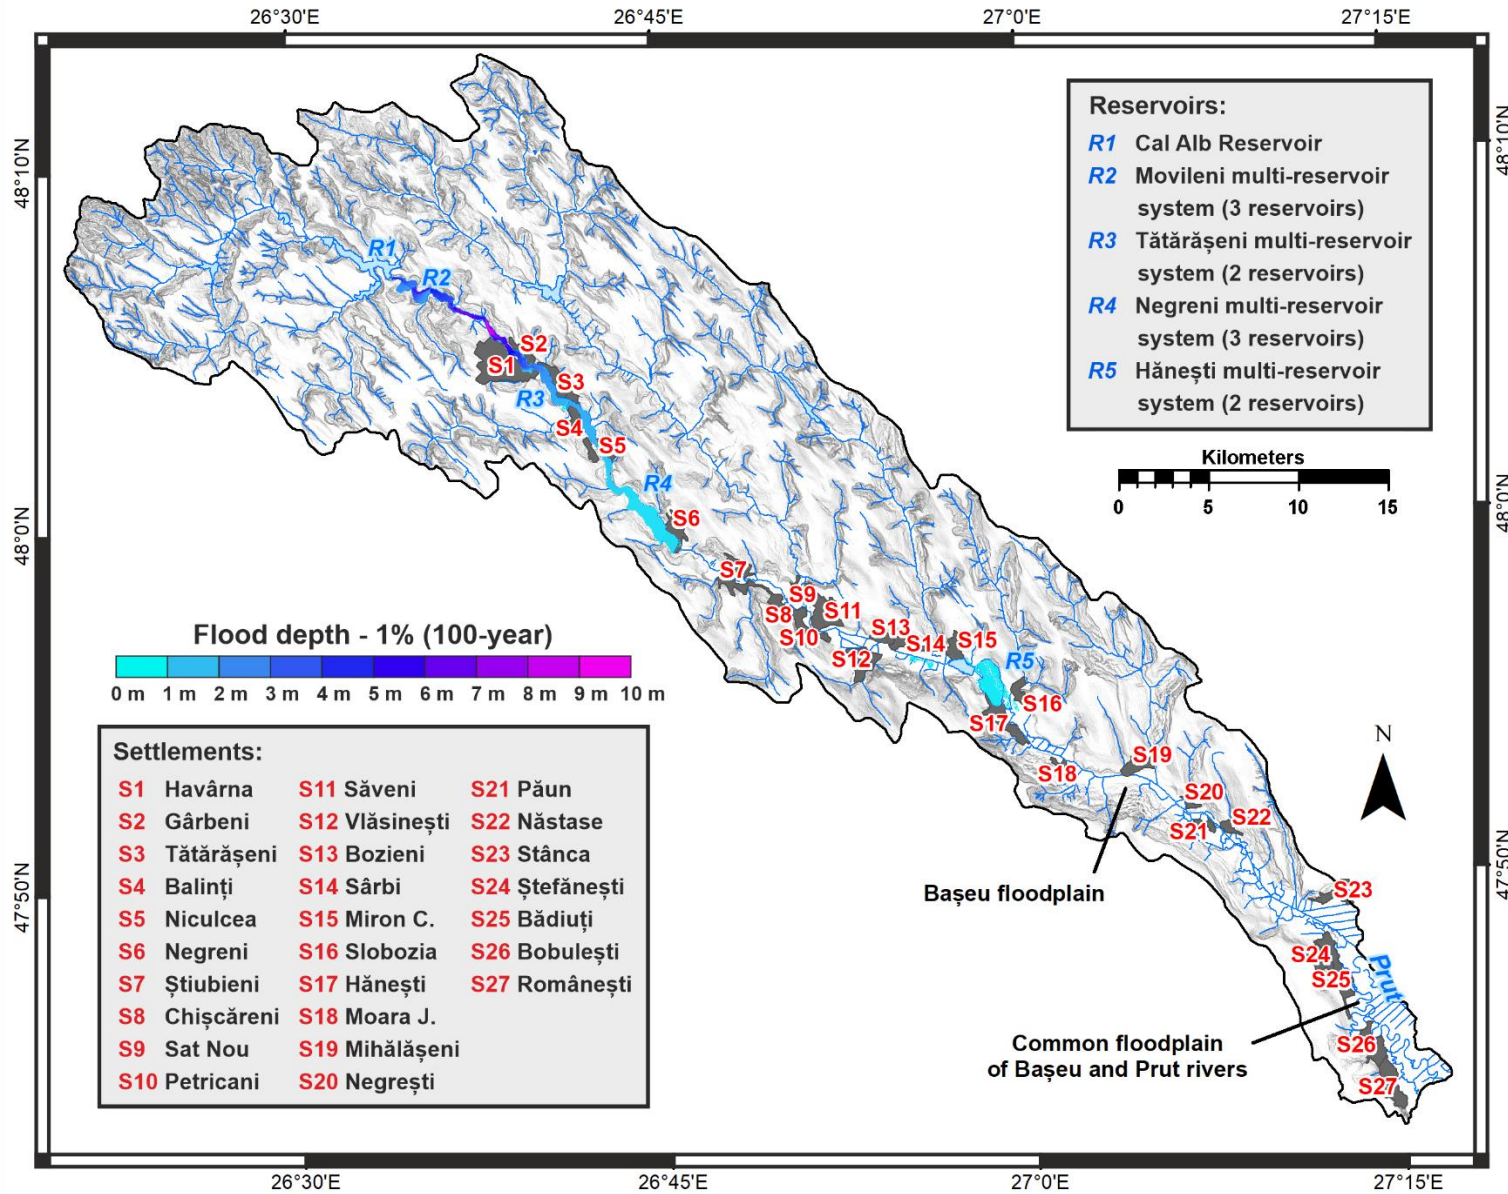

**Figure S4** Flood depth (m) within built-up area of 27 settlements located downstream of the Cal Alb reservoir computed for dam break scenarios with 1% (100-year) recurrence intervals



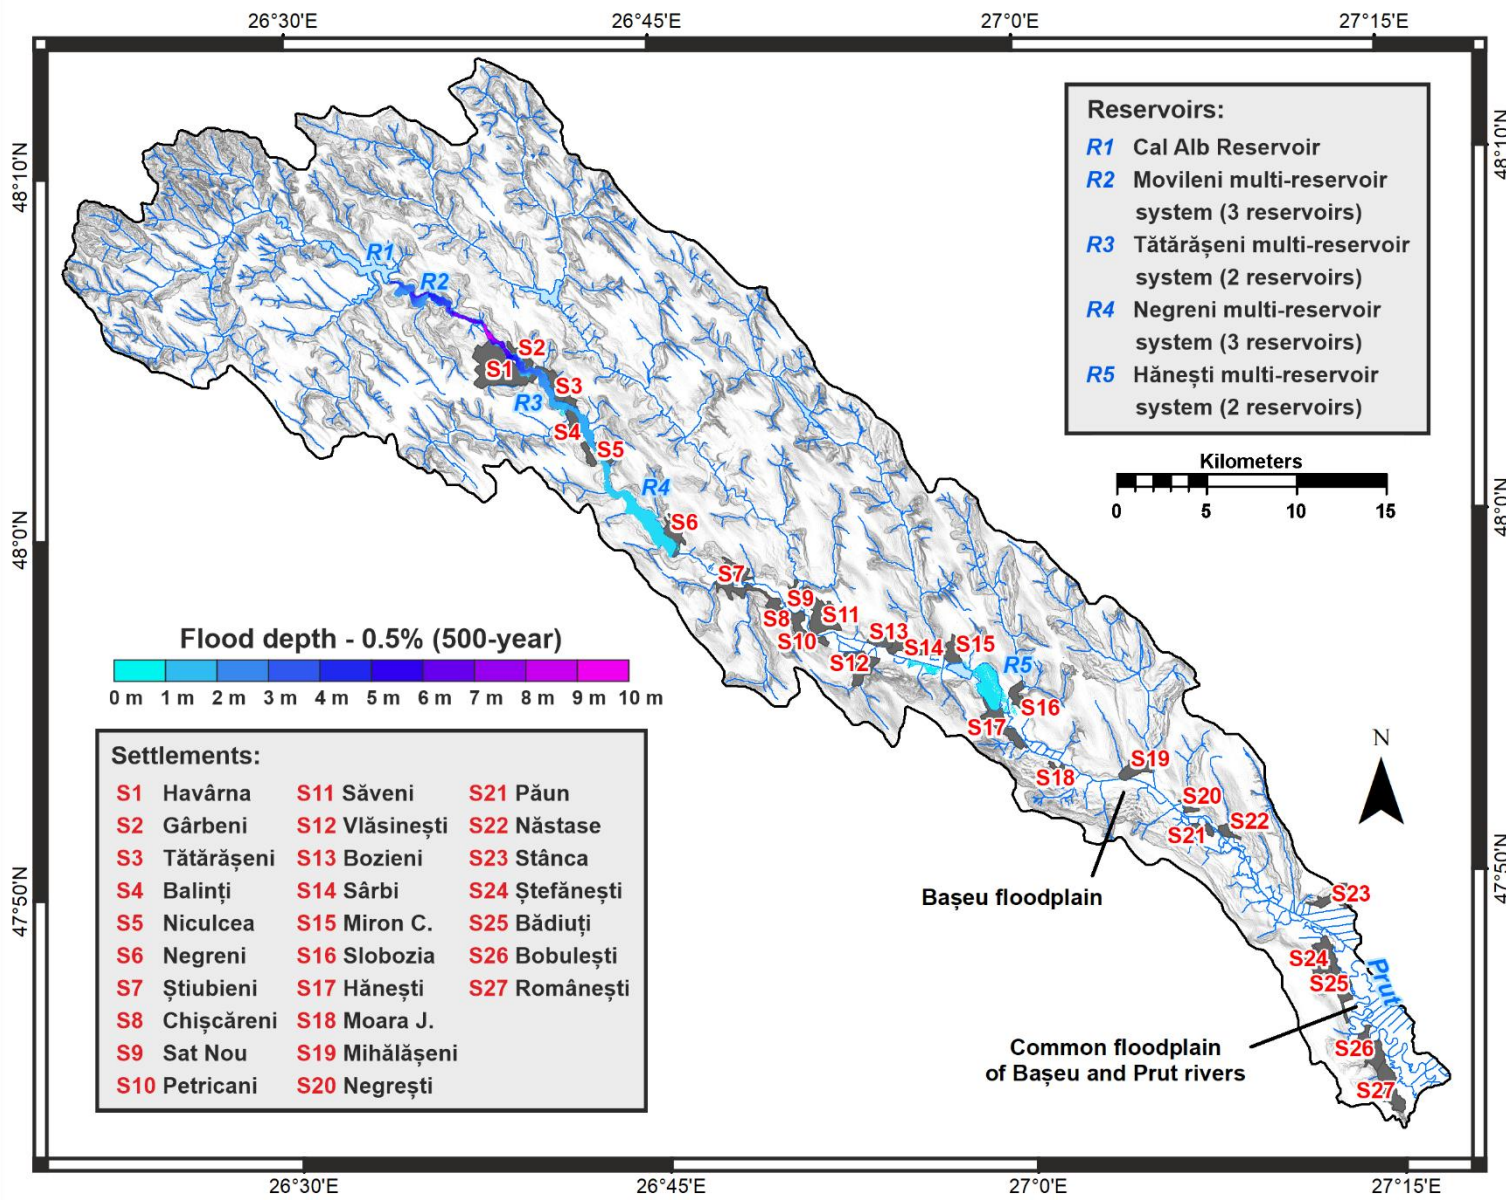

**Figure S5** Flood depth (m) within built-up area of 27 settlements located downstream of the Cal Alb reservoir computed for dam break scenarios with 0.5% (500-year) recurrence intervals

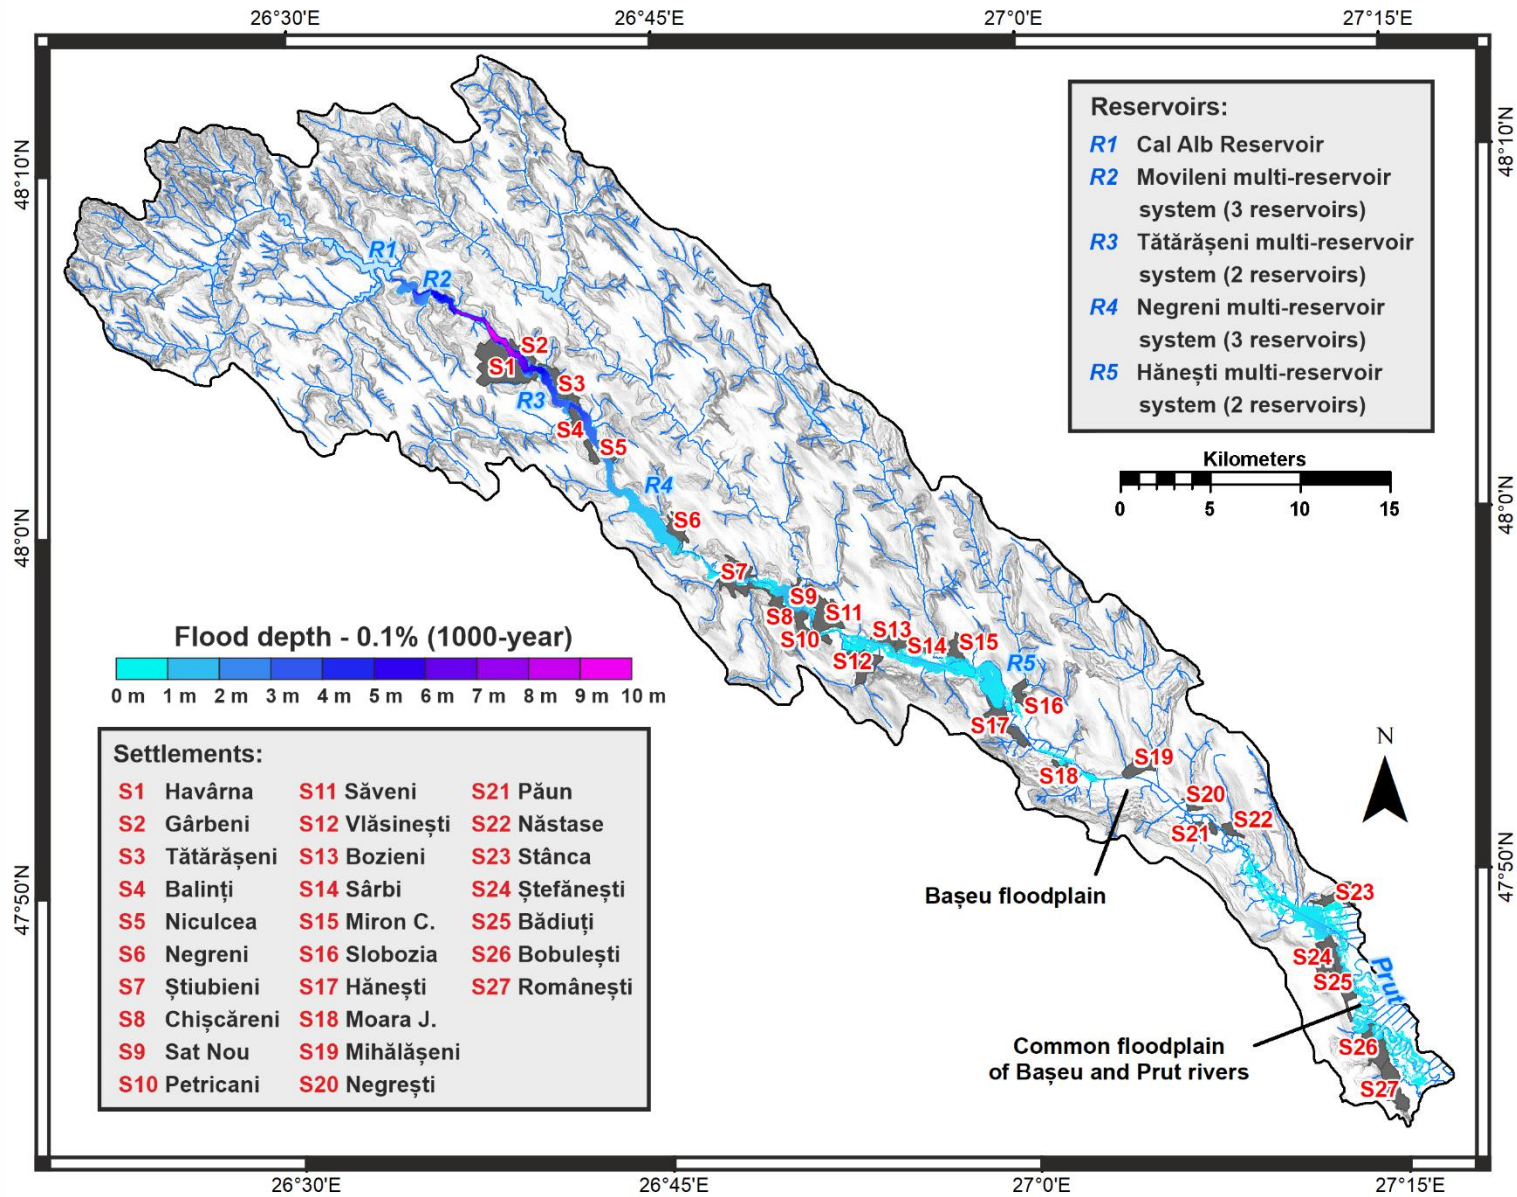

**Figure S6** Flood depth (m) within built-up area of 27 settlements located downstream of the Cal Alb reservoir computed for dam break scenarios with 0.1% (1000-year) recurrence intervals



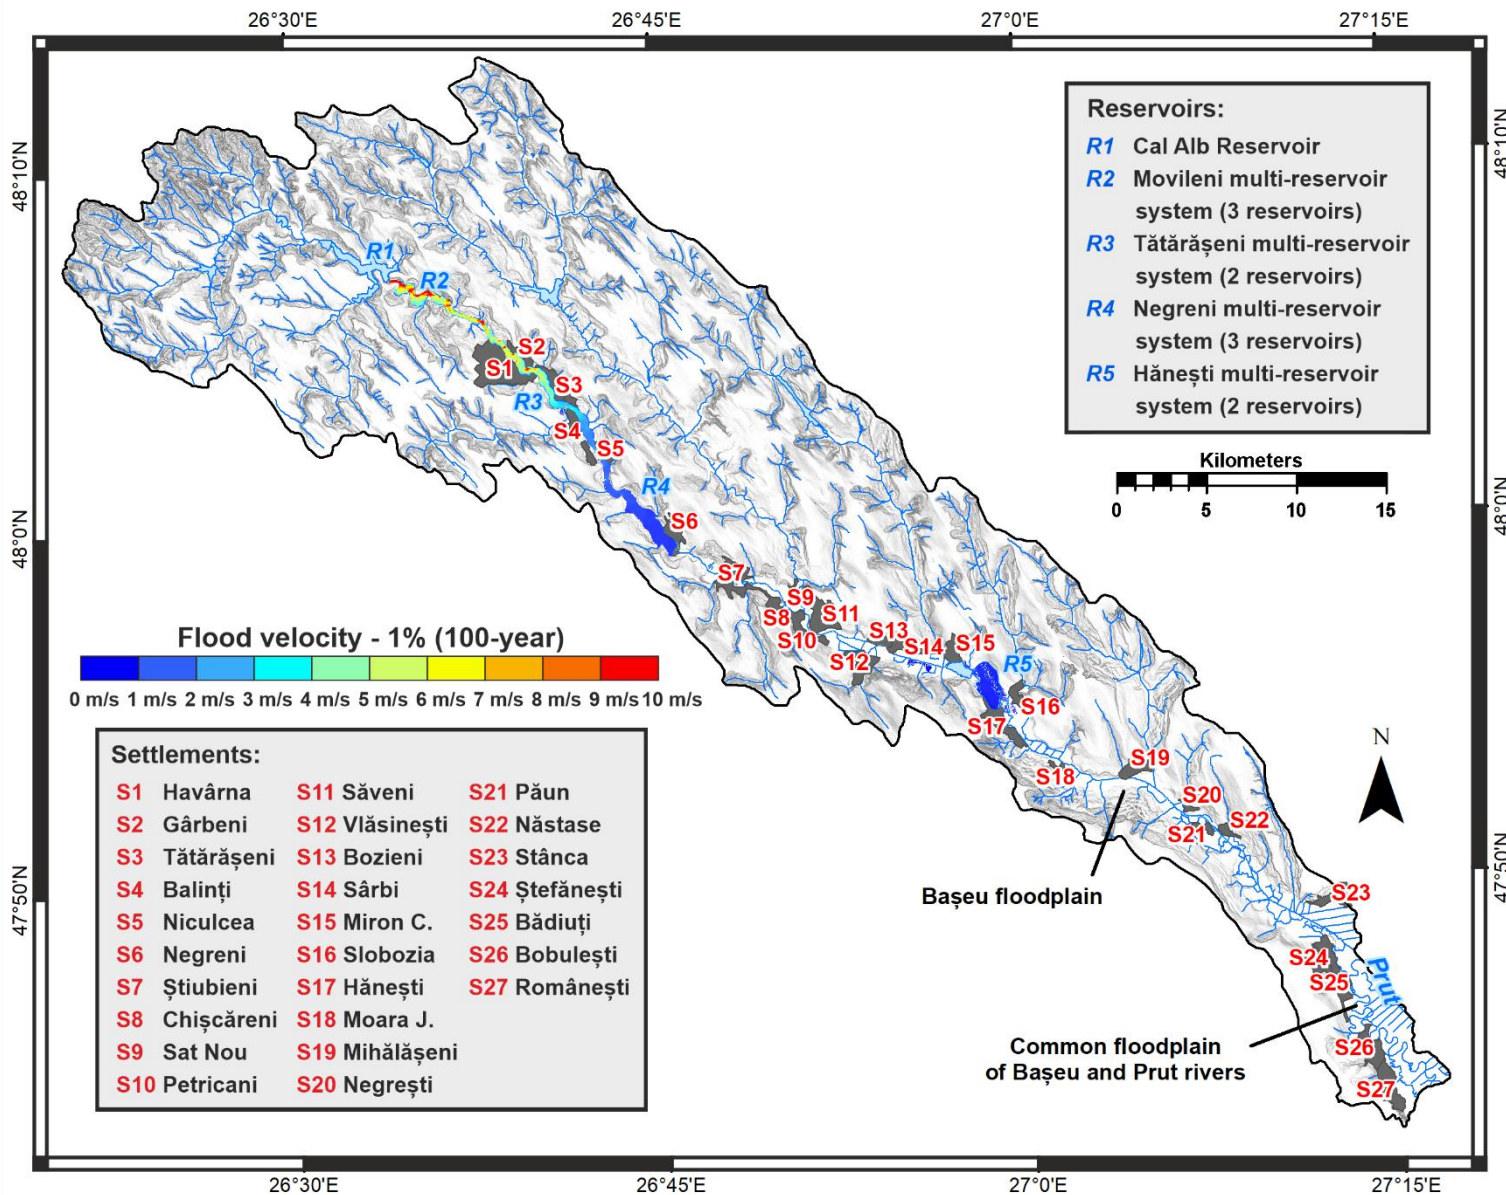

**Figure S7** Flood velocity (m/s) within built-up area of 27 settlements located downstream of the Cal Alb reservoir computed for the dam break scenarios with 1% (100-year) recurrence intervals

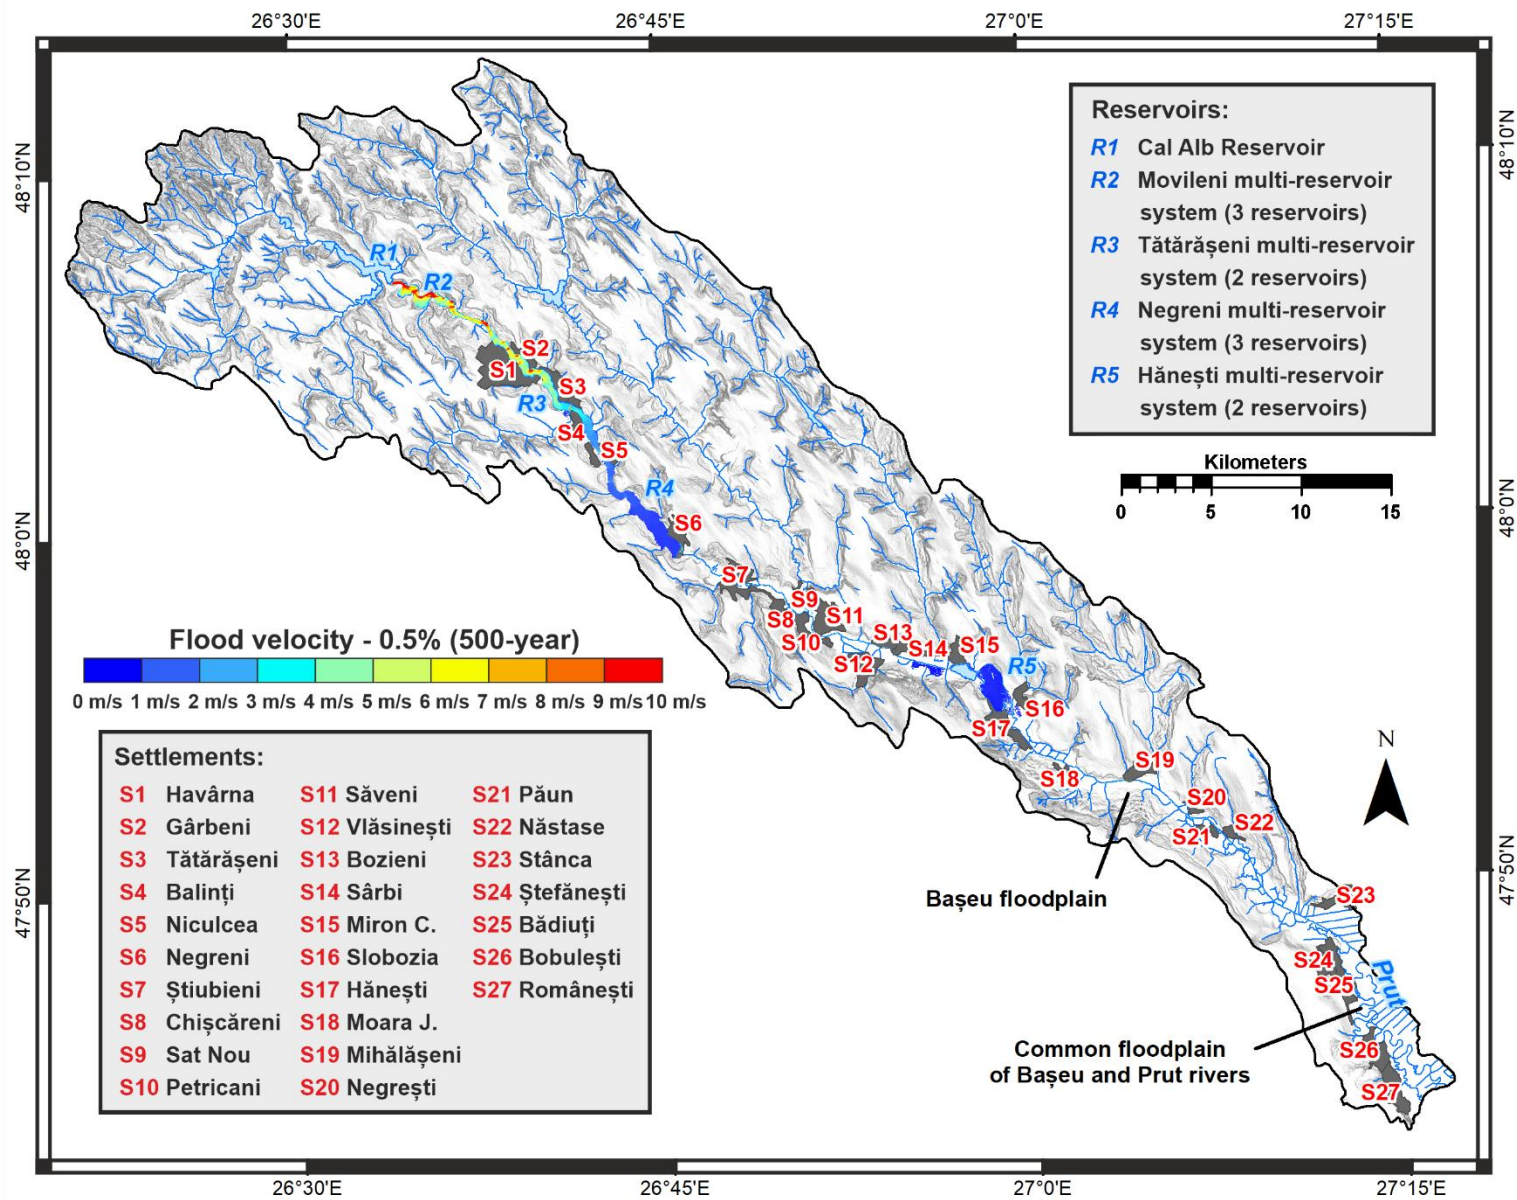

**Figure S8** Flood velocity (m/s) within built-up area of 27 settlements located downstream of the Cal Alb reservoir computed for the dam break scenarios with 0.5% (500-year) recurrence intervals



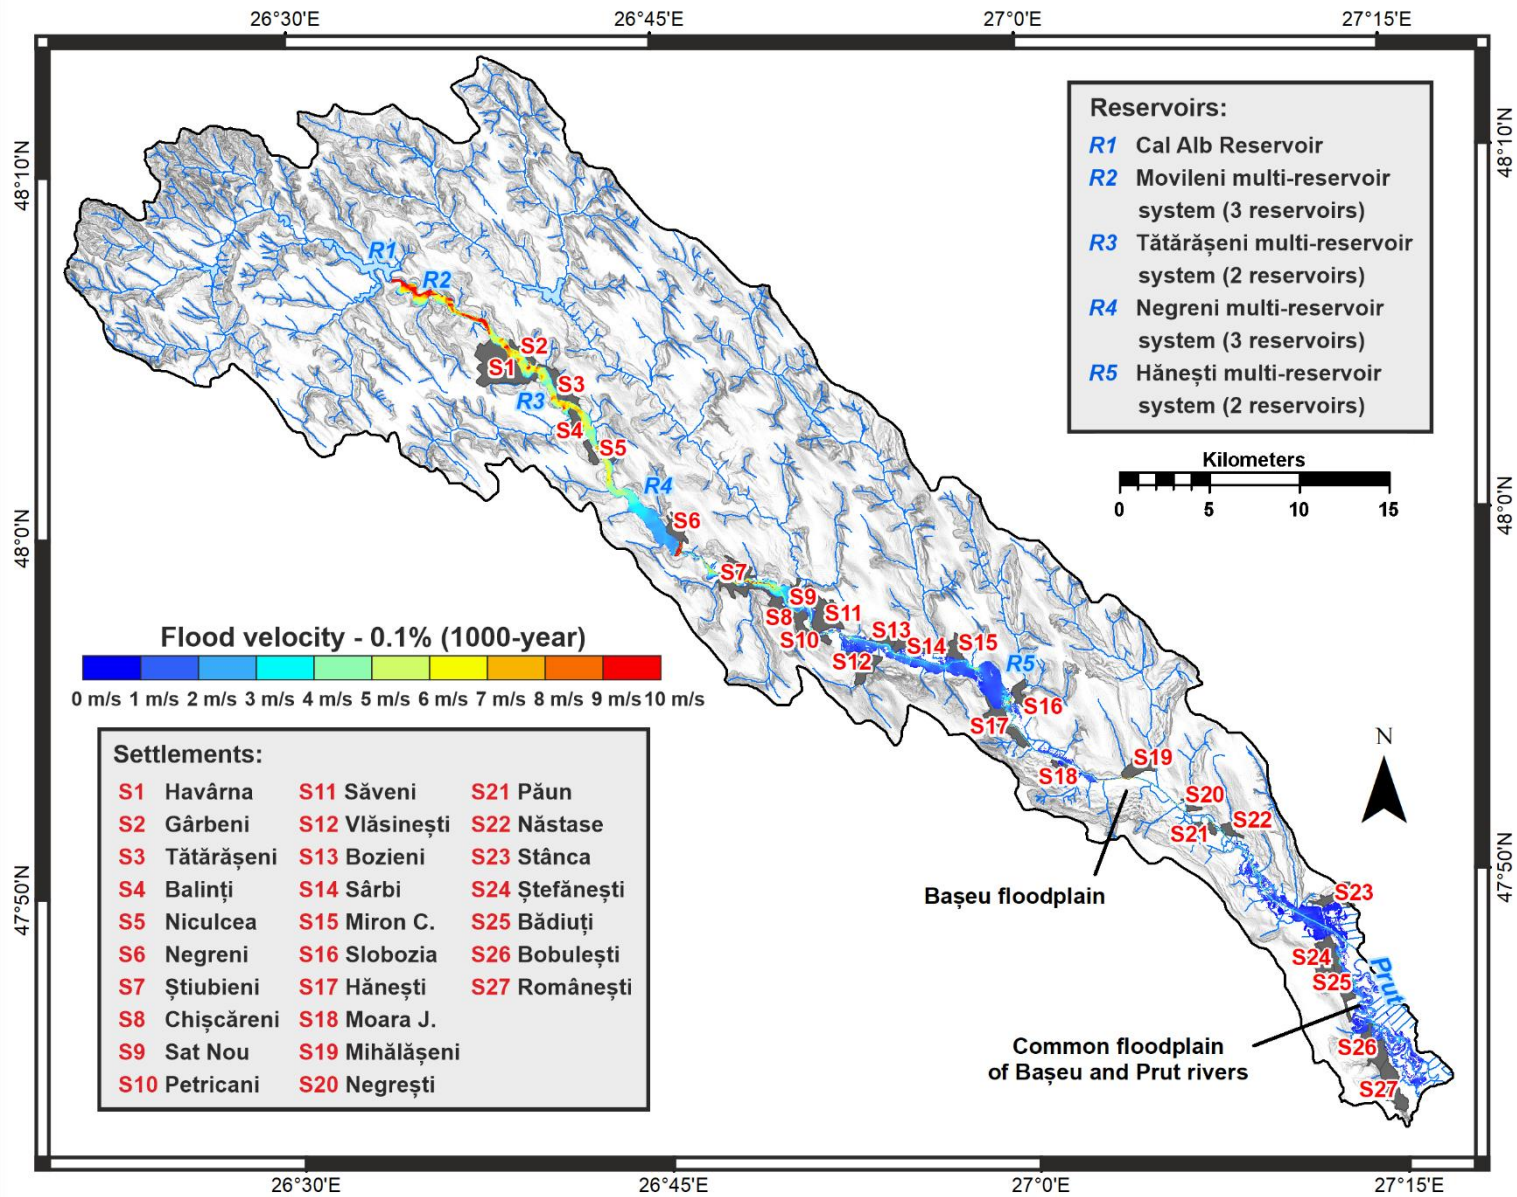

**Figure S9** Flood velocity (m/s) within built-up area of 27 settlements located downstream of the Cal Alb reservoir computed for the dam break scenarios with 0.1% (1000-year) recurrence intervals

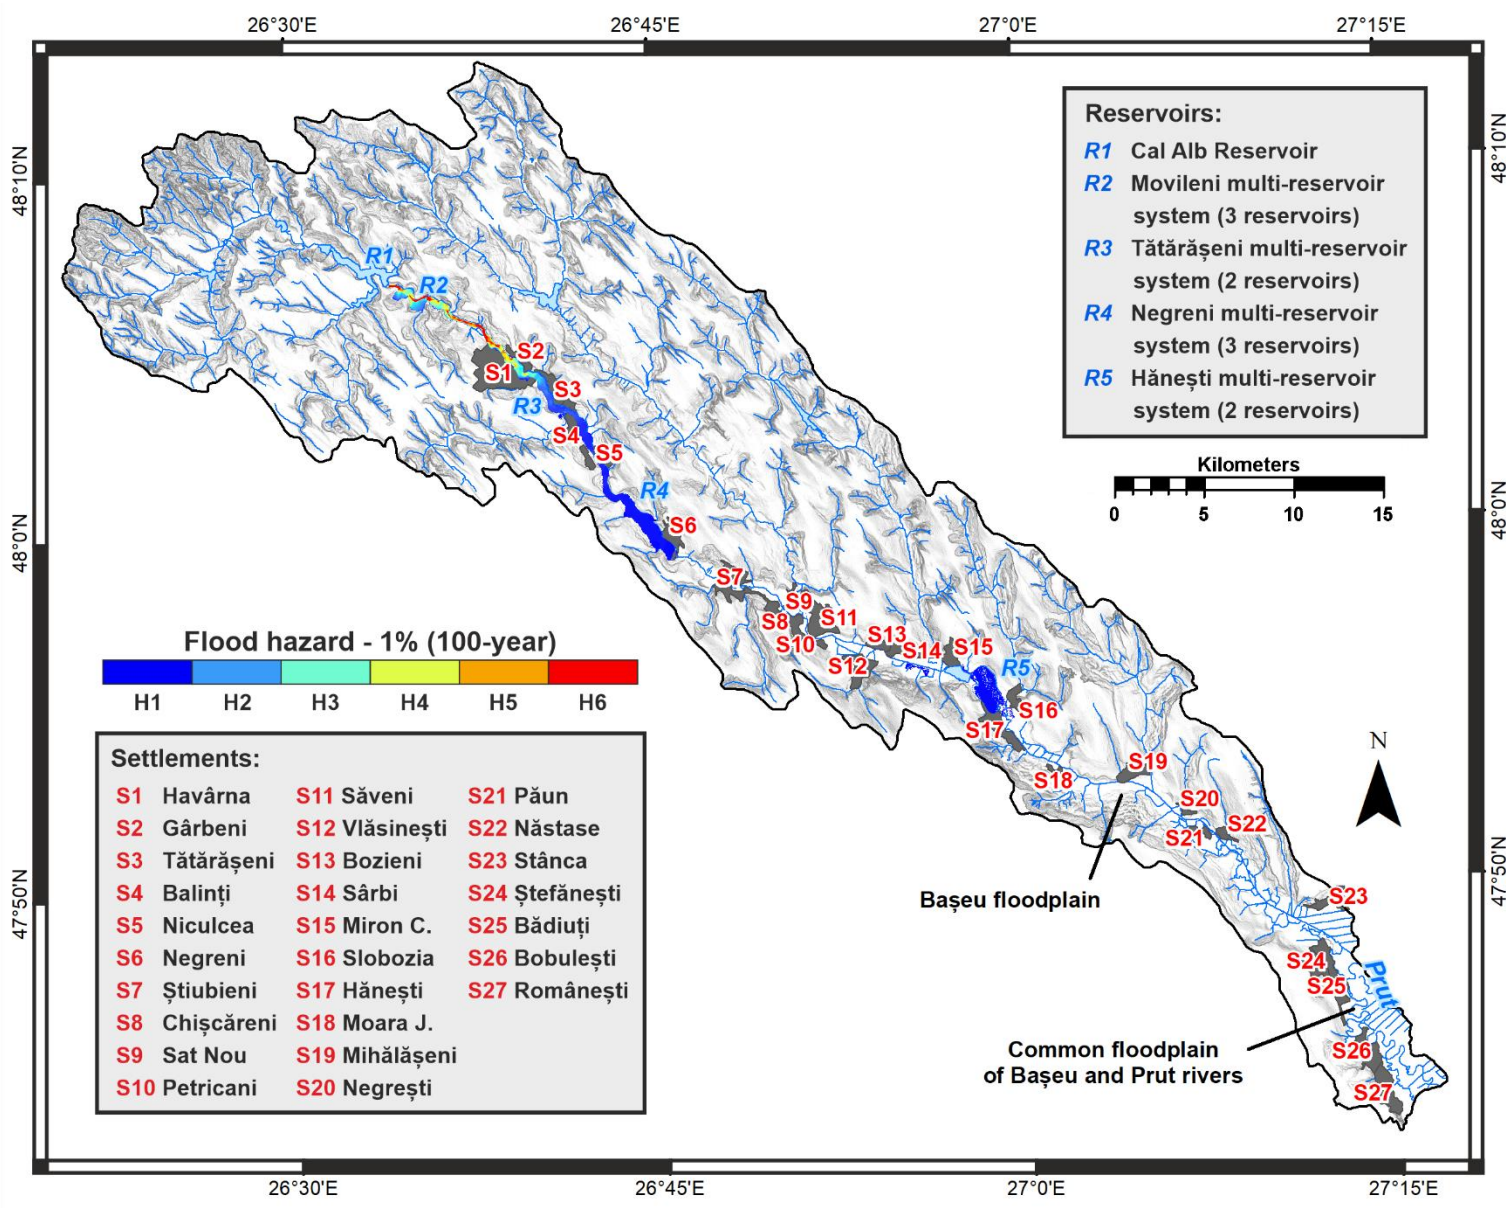

**Figure S10** D\*V (m<sup>2</sup>/s) hazard classes according to the AIDR criteria [46] within built-up area of 27 settlements located downstream of the Cal Alb reservoir computed for dam break scenarios with 1% (100-year) recurrence intervals



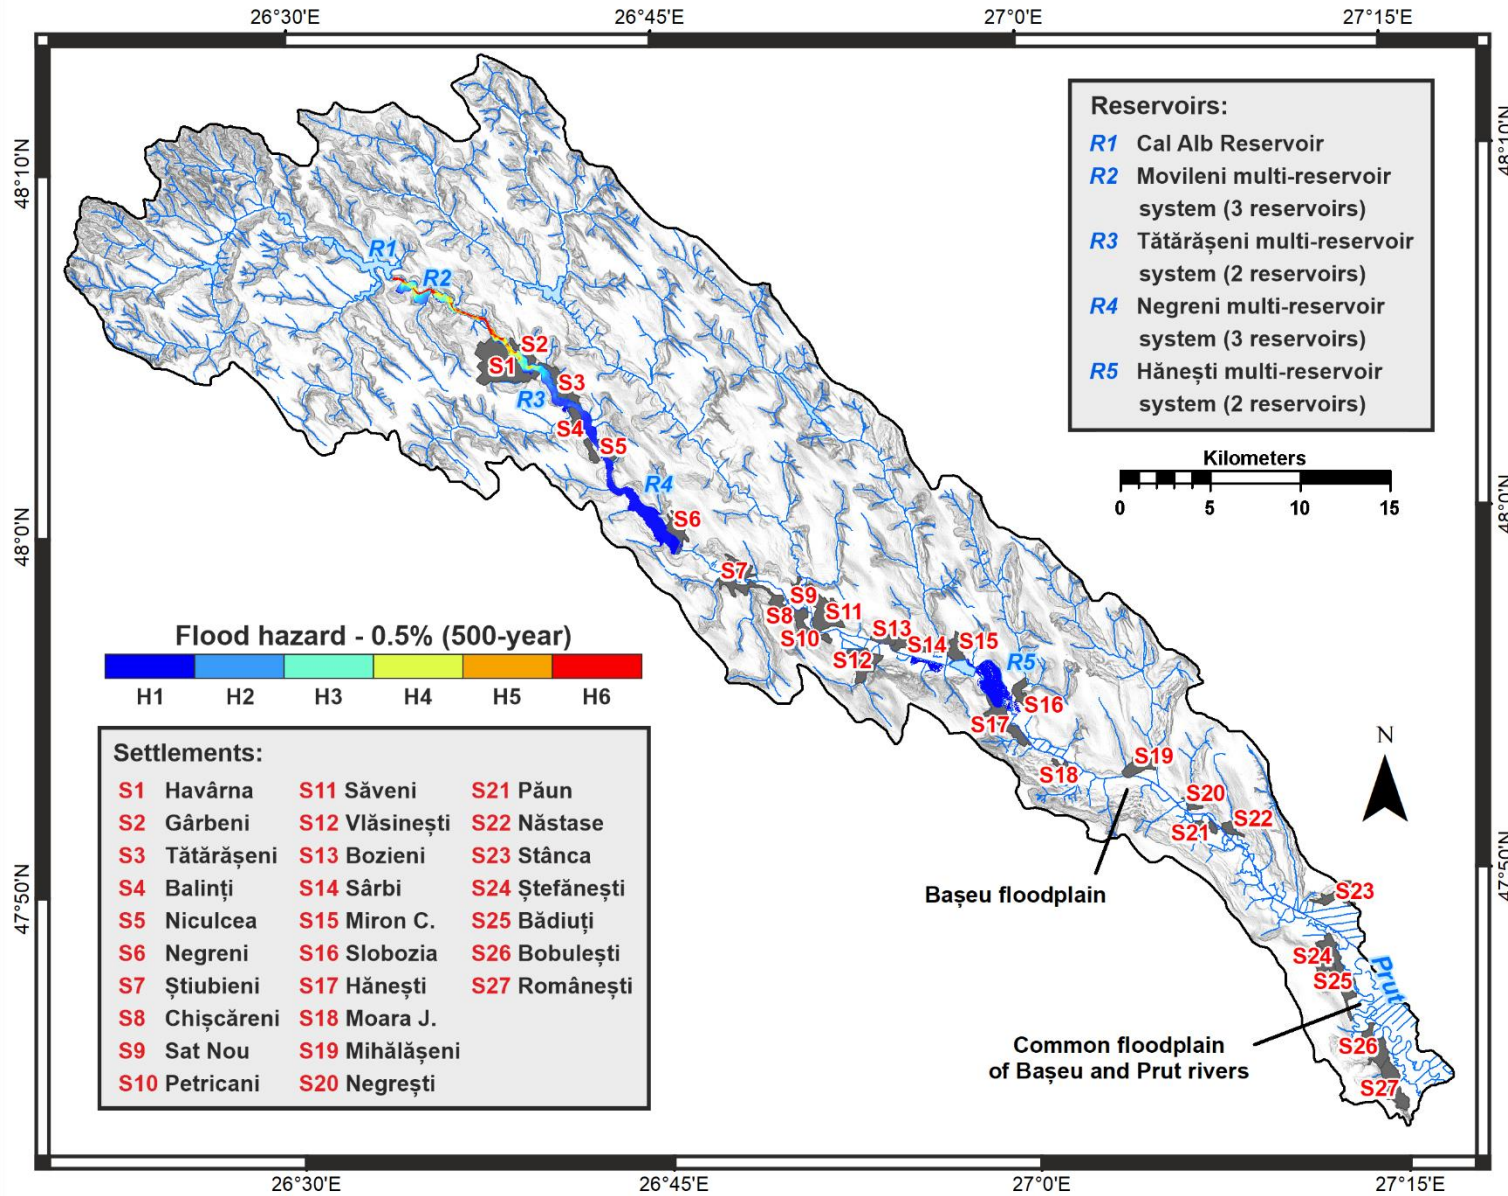

**Figure S11**  $D^*V$  ( $m^2/s$ ) hazard classes according to the AIDR criteria [46] within built-up area of 27 settlements located downstream of the Cal Alb reservoir computed for dam break scenarios with 0.5% (500-year) recurrence intervals

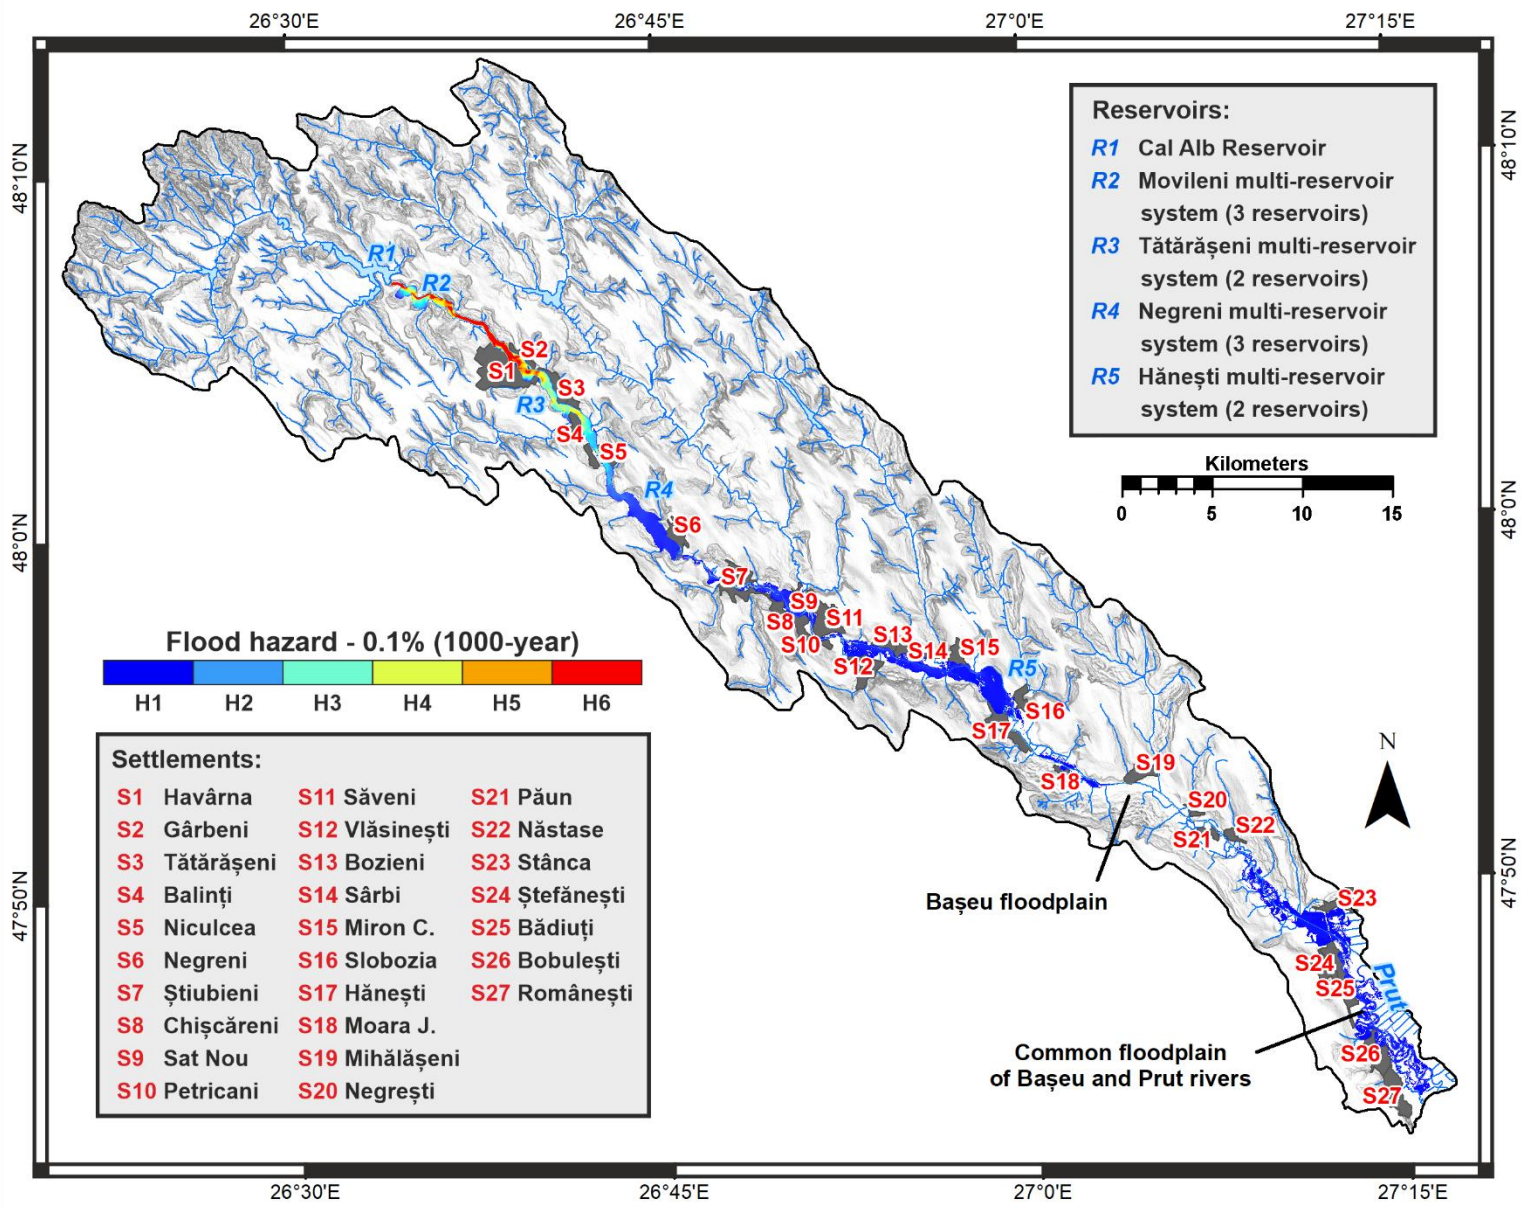

**Figure S12** D\*V (m<sup>2</sup>/s) hazard classes according to the AIDR criteria [46] within built-up area of 27 settlements located downstream of the Cal Alb reservoir computed for dam break scenarios with 0.1% (1000-year) recurrence intervals
